# Supplementary material for: Effects of Combined Supplementation of Macleaya cordata Extract and Benzoic Acid on the Growth Performance, Immune Responses, Antioxidant Capacity, Intestinal Morphology, and Microbial Composition in Weaned Piglets
Source: PubMed Central journal article supplement (PMC8416536; doi:10.3389/fvets.2021.708597), 2021-08-18
Supplement: Data_Sheet_1.pdf [file Data_Sheet_1.pdf]

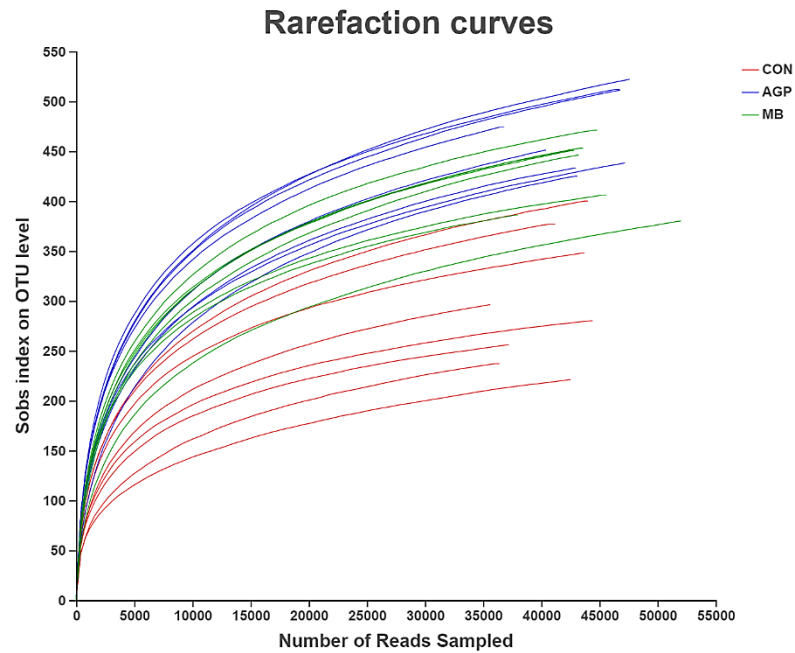

**Supplementary Figure S1.** Rarefaction curve for caecum digesta samples of pigs fed with CON, AGP and MB. CON: basal diet; AGP: basal diet + 20 mg/kg flavomycin + 50 mg/kg quinocetone; MB: basal diet + 50mg/kg *Macleaya cordata* extract +1000mg/kg benzoic acid.

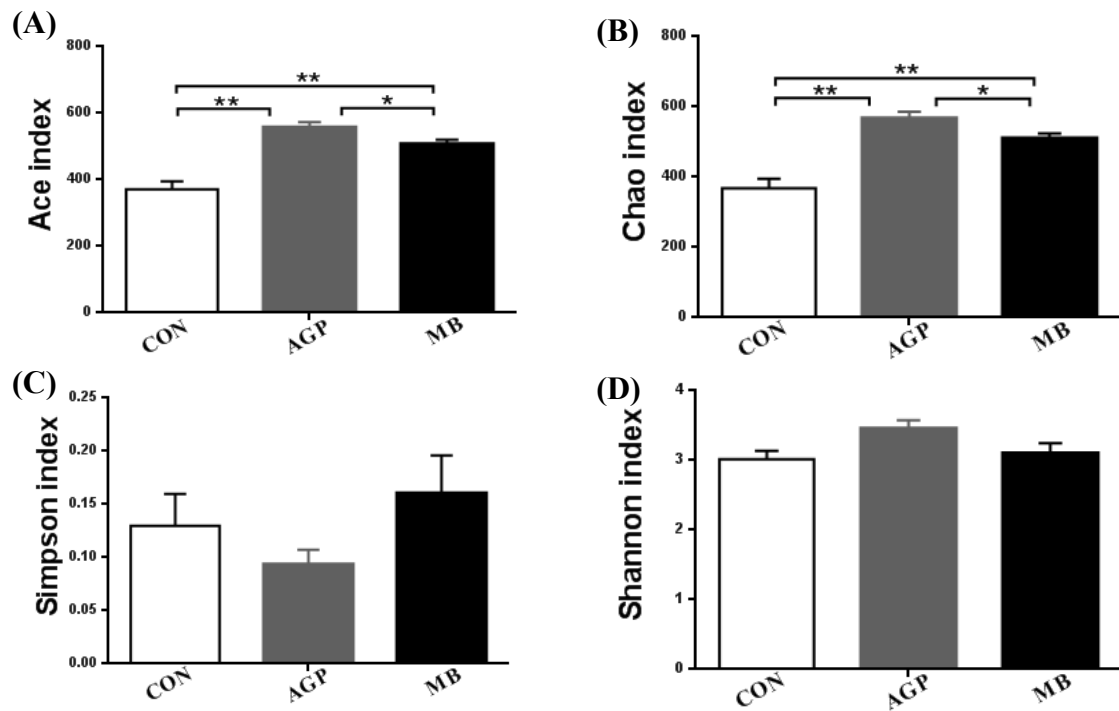

**Supplementary Figure S2.** The richness and diversity index of species at 97% similarity level: Ace index (A), Chao index (B), Simpson index (C) and Shannon index (D). CON: basal diet; AGP: basal diet + 20 mg/kg flavomycin + 50 mg/kg quinocetone; MB: basal diet + 50 mg/kg *Macleaya cordata* extract +1000mg/kg benzoic acid. Asterisks indicate statistical differences between different groups: \*  $0.01 < P \leq 0.05$ , \*\*  $P \leq 0.01$ .

## Community heatmap analysis on Genus level

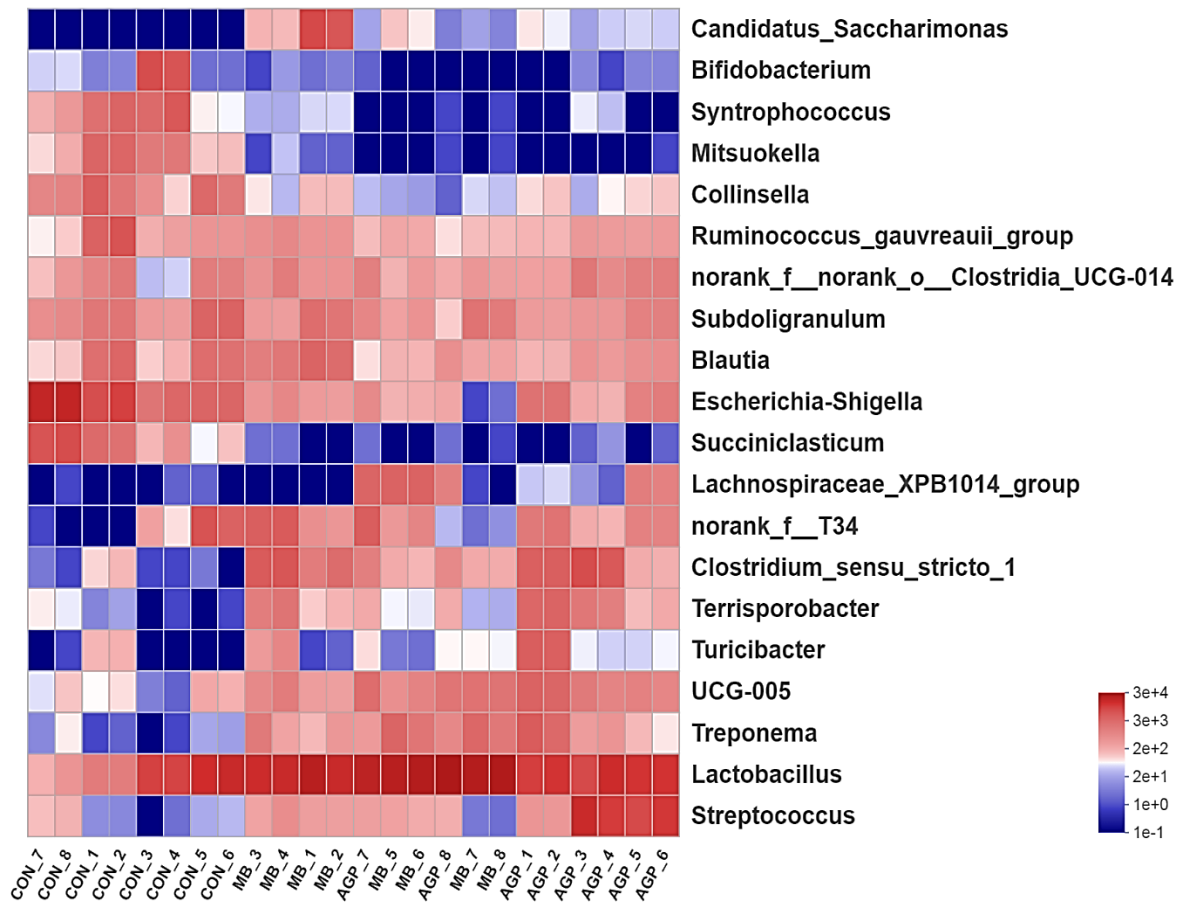

**Supplementary Figure S3.** Heat map based on genus for caecum digesta samples of pigs fed with CON, AGP and MB. CON: basal diet; AGP: basal diet + 20 mg/kg flavomycin + 50 mg/kg quinocetone; MB: basal diet + 50mg/kg *Macleaya cordata* extract +1000mg/kg benzoic acid.
